# Supplementary material for: [11C]metomidate PET-CT versus adrenal vein sampling for diagnosing surgically curable primary aldosteronism: a prospective, within-patient trial
Source: PubMed Central journal article supplement (PMC9873572; doi:10.1038/s41591-022-02114-5), 2023-01-16
Supplement: 41591_2022_2114_MOESM1_ESM.pdf [file 41591_2022_2114_MOESM1_ESM.pdf]

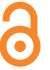

---

# **[<sup>11</sup>C]metomidate PET-CT versus adrenal vein sampling for diagnosing surgically curable primary aldosteronism: a prospective, within-patient trial**

---

In the format provided by the authors and unedited

**Supplementary Table 1. Definition of success of PA/hypertension as per PASO international consensus<sup>14</sup>**

| <b>Outcome measure</b>       | <b>Definition</b>                                                                                                                                                                                                                                                                                                                                                                                                                                                                                                                                                                                                                                                                                                                                                                                                                                                                                                                                                                                                  |
|------------------------------|--------------------------------------------------------------------------------------------------------------------------------------------------------------------------------------------------------------------------------------------------------------------------------------------------------------------------------------------------------------------------------------------------------------------------------------------------------------------------------------------------------------------------------------------------------------------------------------------------------------------------------------------------------------------------------------------------------------------------------------------------------------------------------------------------------------------------------------------------------------------------------------------------------------------------------------------------------------------------------------------------------------------|
| Complete clinical success    | Complete clinical success will be declared when both <b>(a) and (b)</b> have occurred:<br>(a) Normalisation of BP, defined as SBP<135 and DBP<85 mmHg on home BP; if home BP not available, then defined as SBP<140 and DBP<90 mmHg on clinic BP<br>(b) Not taking any antihypertensive medications                                                                                                                                                                                                                                                                                                                                                                                                                                                                                                                                                                                                                                                                                                                |
| Partial clinical success     | Partial clinical success will be declared when the criteria for complete success are not met, and <b>either (a) or (b)</b> has occurred:<br>(a) reduction in BP, with no increase in antihypertensive medication, i.e. both of (i) and (ii) have occurred:<br>(i) BP has reduced, or has normalised, since baseline (based on home BP if available, otherwise based on clinic BP); reduction in BP defined as<br>(1) a reduction in SBP of $\geq 20$ mmHg, or<br>(2) a reduction in DBP of $\geq 10$ mmHg, with a change in SBP of $< 20$ mmHg<br>(ii) the DDD of antihypertensive medication being used is $< 150\%$ of baseline<br>(b) reduction in antihypertensive medication, with no increase in BP, i.e.<br>(i) BP is unchanged since baseline (based on home BP if available, otherwise based on clinic BP); unchanged BP defined as<br>(1) a change in SBP of $< 20$ mmHg, and<br>(2) a change in DBP of $< 10$ mmHg<br>(ii) the DDD of antihypertensive medication being used is $\leq 50\%$ of baseline |
| Absent clinical success      | An absence of clinical success will be declared when neither partial nor complete clinical success can be declared.                                                                                                                                                                                                                                                                                                                                                                                                                                                                                                                                                                                                                                                                                                                                                                                                                                                                                                |
| Complete biochemical success | Complete biochemical success will be declared when both of the following occur:<br>• Serum potassium $\geq 3.6$ mmol/L and<br>• Normalisation of ARR ( $ARR_{\text{activity}} < 750$ pmol/L per ng/ml/hr, if renin activity is recorded, otherwise $ARR_{\text{mass}} < 91$ miU/L)                                                                                                                                                                                                                                                                                                                                                                                                                                                                                                                                                                                                                                                                                                                                 |
| Partial biochemical success  | Partial biochemical success will be declared when the criteria for complete success are not met, and both of the following occur:<br>• Serum potassium $\geq 3.6$ mmol/L and<br>• $\geq 50\%$ reduction in serum aldosterone concentration                                                                                                                                                                                                                                                                                                                                                                                                                                                                                                                                                                                                                                                                                                                                                                         |
| Absent biochemical success   | An absence of biochemical success will be declared when neither partial nor complete clinical success can be declared.                                                                                                                                                                                                                                                                                                                                                                                                                                                                                                                                                                                                                                                                                                                                                                                                                                                                                             |

Defined Daily Dose (DDD) is the assumed average maintenance dose per day for a drug used for its main indication in adults (DDD; ATC/DDD Index 2010: [http://www.whocc.no/atc\\_ddd\\_index/](http://www.whocc.no/atc_ddd_index/) 2010 [date accessed 16/12/2021])

PA, primary aldosteronism; BP, blood pressure; SBP systolic BP; DBP, diastolic BP.

## Supplementary Table 2

### Sensitivity Analysis Results

|                           | 95% Bootstrap Interval | Impact of AVS Failures                           |
|---------------------------|------------------------|--------------------------------------------------|
| Clinical Success          |                        |                                                  |
| Complete                  | (-0.235, 0.073)        | Not Significant                                  |
| Partial or Complete       | (-0.086, 0.222)        | Not Significant                                  |
| Biochemical Success       |                        |                                                  |
| Complete                  | (-0.018, 0.271)        | Not Significant                                  |
| Partial or Complete       | (0.009, 0.291)         | Significant (Excluding AVS failures favours AVS) |
| Modified Clinical Success |                        |                                                  |
| Complete                  | (-0.226, 0.081)        | Not Significant                                  |
| Partial or Complete       | (-0.077, 0.231)        | Not Significant                                  |

### Supplementary Table 2: Sensitivity analysis

Supplementary analysis using Bootstrap method showing effect of excluding AVS 'failures' on the relative accuracy of MTO and AVS in predicting biochemical but not clinical success.

**Supplementary Table 3. 'Modified' definition of success of PA/hypertension**

| Outcome measure                    | Definition                                                                                                                                                                                                                                                                                                                                                                                                                                                                                                                                                                                                                                                                                                                                                                                                                                                                                                                                                |
|------------------------------------|-----------------------------------------------------------------------------------------------------------------------------------------------------------------------------------------------------------------------------------------------------------------------------------------------------------------------------------------------------------------------------------------------------------------------------------------------------------------------------------------------------------------------------------------------------------------------------------------------------------------------------------------------------------------------------------------------------------------------------------------------------------------------------------------------------------------------------------------------------------------------------------------------------------------------------------------------------------|
| Modified complete clinical success | Complete modified clinical success will be declared when <b>both (a) and (b)</b> have occurred:<br>(a) Normalisation of SBP, defined as SBP<135mmHg on home BP; if home BP not available, then defined as SBP<140mmHg on clinic BP<br>(b) Not taking any antihypertensive medications                                                                                                                                                                                                                                                                                                                                                                                                                                                                                                                                                                                                                                                                     |
| Modified partial clinical success  | Partial modified clinical success will be declared when the criteria for complete success are not met, and <b>either (a) or (b)</b> has occurred:<br>(a) reduction in SBP, with no increase in antihypertensive medication, i.e. both of (i) and (ii) have occurred:<br>(i) SBP has reduced by ≥20mmHg, or has normalised, since baseline (based on home BP if available, otherwise based on clinic BP)<br>(ii) the number of classes of antihypertensive medication being used is no more than 1 more than at baseline<br>(b) reduction in antihypertensive medication, with no increase in SBP, i.e.<br>(i) SBP is unchanged since baseline (based on home BP if available, otherwise based on clinic BP); unchanged SBP defined as a change in either direction of <20mmHg<br>(ii) the number of classes of antihypertensive medication being used has reduced by 2 or more since baseline, or the use of antihypertensive medication has been stopped |
| Modified absent clinical success   | An absence of clinical success will be declared when neither partial nor complete clinical success can be declared.                                                                                                                                                                                                                                                                                                                                                                                                                                                                                                                                                                                                                                                                                                                                                                                                                                       |

**Supplementary Table 3. Definition of success of PA/Hypertension**

**a.** Definition of success of PA / Hypertension as defined by the international PASO consensus.<sup>14</sup>

**b.** 'Modified' definition of clinical success.

Defined Daily Dose (DDD) is the assumed average maintenance dose per day for a drug used for its main indication in adults (DDD; ATC/DDD Index 2010: [http://www.whocc.no/atc\\_ddd\\_index/](http://www.whocc.no/atc_ddd_index/) 2010 [date accessed 16/12/2021])

PA, primary aldosteronism; BP, blood pressure; SBP systolic BP; DBP, diastolic BP.

Supplementary Table 4

| Adrenal no. | Gene 1         | Mutation 1         | Gene 2        | Mutation 2 | Method of detection |
|-------------|----------------|--------------------|---------------|------------|---------------------|
| 1           | <i>CACNA1D</i> | p.F767L            |               |            | RNA seq             |
| 2           | <i>CACNA1D</i> | p.V1373M           |               |            | RNA seq             |
| 3           | <i>CACNA1D</i> | p.G403R            |               |            | WES & RNA seq       |
| 4           | <i>CACNA1D</i> | p.I1035T           |               |            | RNA seq             |
| 5           | <i>CACNA1D</i> | p.R990G            |               |            | RNA seq             |
| 6           | <i>CACNA1D</i> | p.I750M            |               |            | WES & RNA seq       |
| 7           | <i>CACNA1D</i> | p.F767V            |               |            | RNA seq             |
| 8           | <i>CACNA1D</i> | p.F767V            |               |            | WES & RNA seq       |
| 9           | <i>CACNA1D</i> | p.V621G            |               |            | WES & RNA seq       |
| 10          | <i>CACNA1D</i> | p.G403R            |               |            | RNA seq             |
| 11          | <i>CACNA1D</i> | p.R639P            |               |            | WES & RNA seq       |
| 12          | <i>CACNA1D</i> | p.F747L            |               |            | WES & RNA seq       |
| 13          | <i>CACNA1D</i> | p.F747L            |               |            | WES & RNA seq       |
| 14          | <i>CACNA1D</i> | p.I1152N           |               |            | RNA seq             |
| 15          | <i>CACNA1D</i> | p.V1373M           |               |            | RNA seq             |
| 16          | <i>CACNA1D</i> | p.R990H            |               |            | RNA seq             |
| 17          | <i>CACNA1D</i> | p.V1373M           |               |            | WES                 |
| 18          | <i>CACNA1D</i> | p.R990G            |               |            | RNA seq             |
| 19 nodule 1 | <i>CACNA1D</i> | p.F747L            |               |            | RNA seq             |
| 19 nodule 2 | <i>CACNA1D</i> | p.F747L            |               |            | RNA seq             |
| 20          | <i>CACNA1D</i> | p.G403R            |               |            | WES & RNA seq       |
| 21          | <i>KCNJ5</i>   | p.L168R            |               |            | Sanger seq          |
| 22          | <i>KCNJ5</i>   | p.L168R            |               |            | WES                 |
| 23          | <i>KCNJ5</i>   | p.E145Q            |               |            | WES & RNA seq       |
| 24          | <i>KCNJ5</i>   | p.G151R            |               |            | WES & RNA seq       |
| 25          | <i>KCNJ5</i>   | p.G151R            |               |            | RNA seq             |
| 26          | <i>KCNJ5</i>   | p.L168R            |               |            | WES & RNA seq       |
| 27          | <i>KCNJ5</i>   | p.G151R            |               |            | RNA seq             |
| 28          | <i>KCNJ5</i>   | p.G151R            |               |            | WES & RNA seq       |
| 29          | <i>KCNJ5</i>   | p.G151R            |               |            | WES & RNA seq       |
| 30          | <i>KCNJ5</i>   | p.L168R            |               |            | RNA seq             |
| 31          | <i>KCNJ5</i>   | p.L168R            |               |            | WES                 |
| 32          | <i>KCNJ5</i>   | p.G151R            |               |            | RNA seq             |
| 33          | <i>KCNJ5</i>   | p.G151R            |               |            | WES & RNA seq       |
| 34          | <i>KCNJ5</i>   | p.L168R            |               |            | Sanger seq          |
| 35          | <i>KCNJ5</i>   | p.G151R            |               |            | WES                 |
| 36          | <i>KCNJ5</i>   | p.G151R            |               |            | RNA seq             |
| 37          | <i>KCNJ5</i>   | p.G151R            |               |            | WES                 |
| 38          | <i>KCNJ5</i>   | p.G151R            |               |            | WES & RNA seq       |
| 39          | <i>ATP1A1</i>  | p.E960_L964delinsV |               |            | RNA seq             |
| 40          | <i>ATP1A1</i>  | p.L104R            |               |            | RNA seq             |
| 41          | <i>ATP1A1</i>  | p.L104R            |               |            | RNA seq             |
| 42          | <i>ATP1A1</i>  | p.L104R            |               |            | WES & RNA seq       |
| 43          | <i>ATP1A1</i>  | p.L104R            |               |            | WES                 |
| 44 nodule 1 | <i>ATP1A1</i>  | p.L104R            |               |            | RNA seq             |
| 44 nodule 2 | <i>ATP1A1</i>  | p.L104R            |               |            | RNA seq             |
| 45          | <i>ATP1A1</i>  | p.L104R            |               |            | WES & RNA seq       |
| 46          | <i>ATP1A1</i>  | p.E960_L964delinsV |               |            | WES & RNA seq       |
| 47          | <i>ATP1A1</i>  | p.E960_L964delinsV |               |            | WES & RNA seq       |
| 48          | <i>ATP1A1</i>  | p.G99-L104del      |               |            | WES                 |
| 49          | <i>ATP1A1</i>  | p.L104R            |               |            | WES                 |
| 50          | <i>ATP1A1</i>  | p.F959_962del      |               |            | RNA seq             |
| 51          | <i>ATP2B3</i>  | p.L425_V426del     |               |            | WES & RNA seq       |
| 52          | <i>ATP2B3</i>  | p.L425_V426del     |               |            | WES & RNA seq       |
| 53          | <i>ATP2B3</i>  | p.G123R*           |               |            | WES & RNA seq       |
| 54          | <i>ATP2B3</i>  | p.L425_V426del     | <i>CTNNB1</i> | p.S31P     | RNA seq             |
| 55          | <i>ATP2B3</i>  | p.L425_V426del     |               |            | RNA seq             |
| 56          | <i>ATP2B3</i>  | p.L425_V426del     |               |            | WES                 |
| 57          | <i>ATP2B3</i>  | p.L425_V426del     |               |            | WES & RNA seq       |
| 58          | <i>GNAQ</i>    | p.Q209L            | <i>CTNNB1</i> | p.G34R     | RNA seq             |
| 59          | <i>GNAQ</i>    | p.Q209H            | <i>CTNNB1</i> | p.G34E     | RNA seq             |
| 60          | <i>CLCN2</i>   | p.N356_L359del**   |               |            | WES & RNA seq       |

#### **Supplementary Table 4: Genotyping APAs**

Table showing mutations identified in APAs, in genes previously associated with somatic mutations in APAs. The method of detection (RNA seq, WES, Sanger sequencing) is also shown.

APA, aldosterone producing adenoma; RNA seq, RNA sequencing; WES, whole exome sequencing; Sanger seq, sanger sequencing.

## Supplementary Table 5

a.

|           |                                 | Proportional Odds Model |         |
|-----------|---------------------------------|-------------------------|---------|
|           |                                 | OR (95% CI)             | p       |
| Genotype  | <i>KCNJ5</i> vs. Other          | 3.43 (0.58, 20.74)      | p=0.087 |
|           | <i>CACNA1D</i> vs. Other        | 0.44 (0.10, 1.74)       |         |
|           | <i>KCNJ5</i> vs. <i>CACNA1D</i> | 7.84 (1.24, 55.96)      |         |
| Age       | per 10 years                    | 0.48 (0.24, 0.87)       | p=0.015 |
| Sex       | Female vs. Male                 | 3.44 (0.70, 18.29)      | p=0.128 |
| Ethnicity | White vs. Black                 | 3.36 (0.70, 17.39)      | p=0.304 |
|           | Asian/Other vs. Black           | 2.08 (0.31, 15.55)      |         |
|           | White vs. Asian/Other           | 1.61 (0.33, 7.63)       |         |

b.

|           |                                 | Proportional Odds Model |         |
|-----------|---------------------------------|-------------------------|---------|
|           |                                 | OR (95% CI)             | p       |
| Genotype  | <i>KCNJ5</i> vs. Other          | 4.08 (0.64, 28.74)      | p=0.074 |
|           | <i>CACNA1D</i> vs. Other        | 0.47 (0.11, 1.89)       |         |
|           | <i>KCNJ5</i> vs. <i>CACNA1D</i> | 8.77 (1.34, 66.50)      |         |
| Age       | per 10 years                    | 0.51 (0.25, 1.00)       | p=0.049 |
| Sex       | Female vs. Male                 | 3.02 (0.57, 16.81)      | p=0.193 |
| Ethnicity | White vs. Black                 | 3.12 (0.64, 16.81)      | p=0.366 |
|           | Asian/Other vs. Black           | 2.07 (0.30, 15.42)      |         |
|           | White vs. Asian/Other           | 1.51 (0.30, 7.24)       |         |

### Supplementary Table 5: Proportional Odds Model

Results from logistic regression analysis of variables predicting clinical success

a. All genotyped patients.

b. Excluding 2 patients with double *GNAQ*&*CTNNB1* mutations.

The p-values are from proportional odds logistical regressions and are based on the resulting t values for the corresponding explanatory variable in the model.

**Supplementary Table 6**

|                      | No. of participants |           |
|----------------------|---------------------|-----------|
|                      | n=128               | n=143     |
| SI Right AV $\geq 3$ | 104 (81%)           | 115 (80%) |
| SI Right AV $< 3$    | 24 (19%)            | 28 (20%)  |
| SI Left AV $\geq 3$  | 117 (91%)           | 132 (92%) |
| SI Left AV $< 3$     | 11 (9%)             | 11 (8%)   |
| SI Both AV $\geq 3$  | 98 (77%)            | 109 (76%) |
| LI $\geq 4$          | 56 (57%)            | 63 (58%)  |
| LI 3-4               | 8 (8%)              | 12 (7%)   |
| LI $< 3$             | 33 (34%)            | 37 (34%)  |

**Supplementary Table 6. Selectivity and Lateralisation Index of all participants**

Table showing selectivity index (SI) of right, left or both adrenal veins (AV). SI is calculated by  $\text{cortisol}_{\text{AV}} / \text{cortisol}_{\text{IVC}}$ .  $\text{SI} \geq 3$  suggests successful cannulation of the adrenal vein. Lateralization Index (LI) is only calculated if SI in both AV is  $\geq 3$ . It is calculated by higher A/C (aldosterone/cortisol) ratio in one adrenal divided by A/C ratio in contralateral adrenal.  $\text{LI} \geq 4$  suggests unilateral PA,  $\text{LI} < 3$  suggests bilateral PA. Results are shown for all patients in the full analysis set (n=143), and in the 128 patients who completed their allocated treatment with 6-9 months follow up data.

IVC, inferior vena cava; AV adrenal vein



**Supplementary Table 7**

| Diagnostic Tests |                | Normalisation of renin and ARR after surgery<br>(ie confirmed unilateral PA) |            |
|------------------|----------------|------------------------------------------------------------------------------|------------|
|                  |                | No                                                                           | Yes        |
| AVS              | PET-CT         |                                                                              |            |
| Unsuccessful     | Bilateral      | A (=9%)                                                                      | B (=0%)    |
| Unsuccessful     | Unilateral     | C (=1%)                                                                      | D (=10%)   |
| Bilateral        | Bilateral      | E (=35%)                                                                     | F (=0%)    |
| Bilateral        | Unilateral     | G (=1%)                                                                      | H (=9%)    |
| Unilateral       | Bilateral      | I (=0.5%)                                                                    | J (=3.5%)  |
| Unilateral (c)   | Unilateral     | K (=1%)                                                                      | L (=29%)   |
| Unilateral (d)   | Unilateral     | M (=0.25%)                                                                   | O (=0.25%) |
| Unilateral       | Unilateral (d) | P (=0.25%)                                                                   | Q (=0.25%) |

**Supplementary Table 7. Predicted frequencies and permutations of outcomes from both investigations**

Table showing potential outcomes from the two separate investigations and the predicted frequency of each outcome based on experience at each participating center. The power calculations were based on the above predicted frequencies.

c = concordant (MTO and AVS lateralizes to same side); d = discordant (MTO and AVS lateralizes to opposite sides)

ARR, aldosterone renin ratio

### Supplementary Table 8

| Gene           | Assay ID      | Amplicon Length | Properties                        |
|----------------|---------------|-----------------|-----------------------------------|
| <i>18S</i>     | Hs99999901_s1 | 187             | Primer and probe within same exon |
| <i>CYP11B2</i> | Hs01597732_m1 | 137             | Spans exon 5 - 6                  |
| <i>CYP11B1</i> | Hs01596404_m1 | 137             | Spans exon 2 - 3                  |

### Supplementary Table 8. Quantitative PCR probes

Features and assay IDs of Taqman Gene Expression Assays used in qPCR quantification of mRNA expression of genes of interest.
